# Supplementary material
Source: PubMed Central journal article supplement (PMC5779815)
Supplement: mmc1.pdf [file mmc1.pdf]

# Cross-Validation of Optimized Composites for Preclinical Alzheimer's

---

---

## Appendix A. Minimizing the minimum detectable $\delta$

We provide sample Rcode that was used to determine weights that would minimize the minimum detectable  $\delta$  as a proportion of the group difference between the target group (e.g. A $\beta$ +) and a control group (e.g A $\beta$ -). We demonstrate the numerical optimization method on a simulated dataset.

### Appendix A.1. Load required Rpackages

```
library(mvtnorm) # simulating multivariate normal data
library(nlme)    # fitting the Mixed Model of Repeated Measures (MMRM)
library(contrast)
library(ggplot2) # plotting
library(longpower) # power calculations for longitudinal data
library(tidyr)   # data manipulation
library(dplyr)
```

### Appendix A.2. Simulation parameters

```
# control group mean is flat
control_mean <- rep(0, 16)
# target group mean is generally decreasing
target_mean <- -c(
  0, 1.00, 1.50, 1.80, # component 1
  0, 0.50, 0.75, 1.00, # component 2
  0, 1.10, 1.20, 1.30, # component 3
  0, 1.50, 1.75, 2.00 # component 4
)
# standard deviations of 4 components over 4 timepoints
component_sd <- c(
  1, 1.25, 1.50, 1.75, # component 1
  1, 1.50, 1.75, 2.00, # component 2
  1, 1.10, 1.20, 1.30, # component 3
  1, 1.25, 1.50, 1.75 # component 4
)
# compound symmetric correlation matrix
R <- matrix(0.5, nrow = 16, ncol = 16)
diag(R) <- 1
# total sample size
N <- 200
# retention rate across 4 timepoints
retention <- c(1, 0.9, 0.8, 0.7)
# variance-covariance matrix
VarCov <- diag(component_sd) %*% R %*% diag(component_sd)
```

### Appendix A.3. Simulate data

```
set.seed(20161118)
dd_control_wide <- cbind(group=0, rmvnorm(N/2, mean=control_mean, sigma=VarCov))
dd_target_wide <- cbind(group=1, rmvnorm(N/2, mean=target_mean, sigma=VarCov))
dd_wide <- as.data.frame(rbind(dd_control_wide, dd_target_wide))
colnames(dd_wide)[-1] <- paste(paste0('Z', 1:4), rep(1:4, each=4), sep='_')
dd_wide$id <- 1:N
dd_long <- gather(dd_wide, component_time, value, -id, -group) %>%
  separate(component_time, c('component', 'time'), sep='_') %>%
  mutate(time=as.numeric(time), Time=as.factor(time),
         Group = factor(group, levels=0:1, labels=c('control', 'target')))
dd <- spread(dd_long, component, value)
head(dd)
```

|   | group | id | time | Time | Group   | Z1      | Z2     | Z3      | Z4     |
|---|-------|----|------|------|---------|---------|--------|---------|--------|
| 1 | 0     | 1  | 1    | 1    | control | 0.0589  | -0.985 | 0.8872  | 2.246  |
| 2 | 0     | 1  | 2    | 2    | control | 0.3227  | -0.954 | -0.9109 | 0.191  |
| 3 | 0     | 1  | 3    | 3    | control | 0.2882  | 0.912  | -1.1351 | -0.148 |
| 4 | 0     | 1  | 4    | 4    | control | 0.5209  | 0.445  | 0.0868  | -0.849 |
| 5 | 0     | 2  | 1    | 1    | control | -0.2579 | -1.993 | -0.7859 | 0.691  |
| 6 | 0     | 2  | 2    | 2    | control | -0.2680 | -1.269 | -1.8823 | -0.137 |

```
ggplot(dd_long, aes(x = time, y = value, color = Group, group=id)) +
  geom_line(alpha=0.5) + facet_wrap(~component)
```

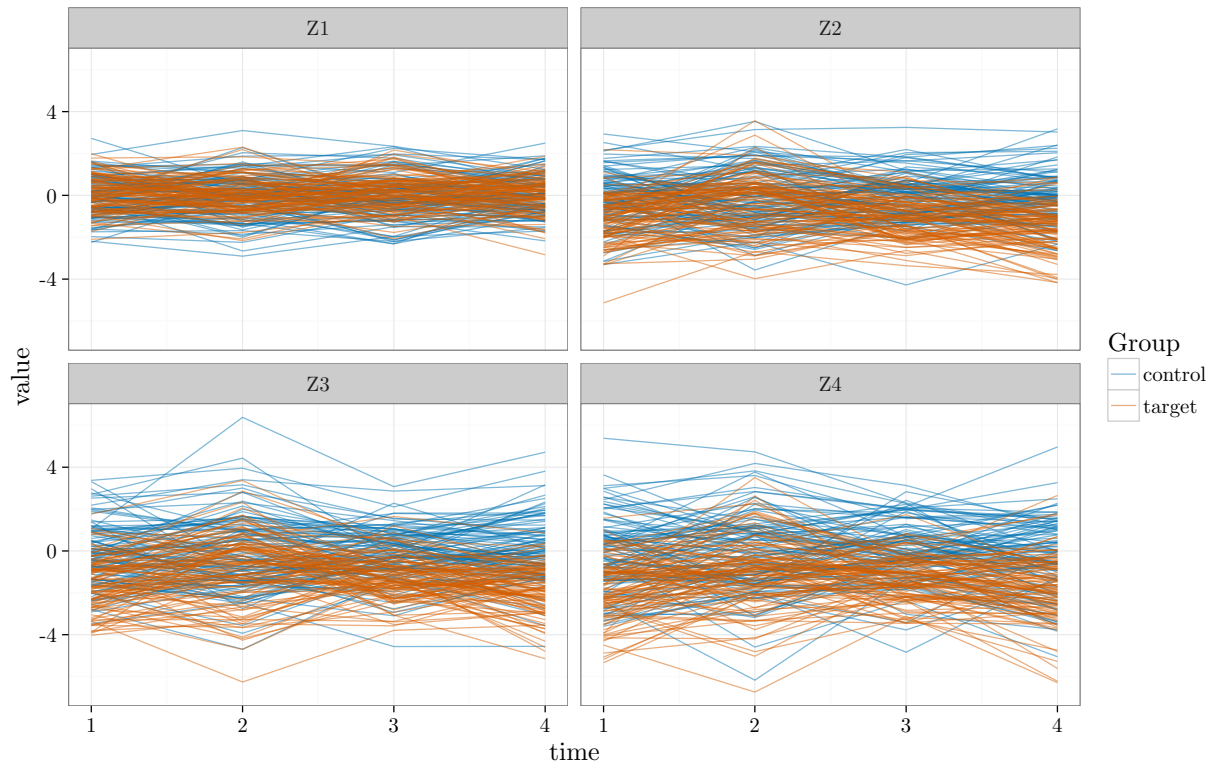

### Appendix A.4. The function to be optimized

The following function returns the minimum detectable effect for given vector of weights

```

delta_as_proportion_of_group_difference <- function(weights, data){
  # calculate composite, Y, as weighted sum of 4 components, given weights
  data$Y <- apply(data[, paste0('Z', 1:4)], 1,
    FUN = weighted.mean, w = weights, na.rm = TRUE)*4

  # fit the MMRM
  fit <- gls(Y ~ Time*Group, data = data,
    correlation = corCompSymm(form = ~ time | id),
    weights = varIdent(form = ~ 1 | time)
  )

  # obtain the treatment effect at last visit
  ctrast <- contrast(fit,
    list(Time=levels(data$Time)[4], Group = levels(data$Group)[2]),
    list(Time=levels(data$Time)[4], Group = levels(data$Group)[1]))

  # extract the variance-covariance parameters for power calculation
  phi <- coef(fit$modelStruct, unconstrained = FALSE)
  Ra <- matrix(phi['corStruct.Rho'], nrow = 4, ncol = 4)
  diag(Ra) <- 1
  v <- coef(fit$modelStruct$varStruct, uncons = FALSE, allCoef = TRUE)

  # determin minimum detectable delta at given power, alpha, retention raet, and sample size
  pow <- power.mmrn(Ra, ra=retention,
    sigmaa = fit$sigma*v[length(v)],
    power = 0.80, sig.level = 0.05, N=200)

  abs(pow$delta/ctrast$Contrast[1])
}

```

So, for example, with equal weights, we get:

```

delta_as_proportion_of_group_difference(rep(0.25,4), dd)

1
0.345

```

#### Appendix A.5. The optimization

To find the weights which minimize `delta_as_proportion_of_group_difference`:

```

opt_weights <- constrOptim(theta = c(0.25, 0.25, 0.25, 0.25),
  f=delta_as_proportion_of_group_difference,
  ui = diag(1, 4), ci = 0,
  method = "Nelder-Mead", data = dd)

```

And the optimized composite is:

```

dd$Y.min.delta <- apply(dd[, paste0('Z', 1:4)], 1,
  FUN = weighted.mean, w = opt_weights$par, na.rm = TRUE)*4
ggplot(dd, aes(x = time, y = Y.min.delta, color = Group, group=id)) +
  geom_line(alpha=0.5) +
  ylab('Composite by minimum detectable  $\delta$ ')

```

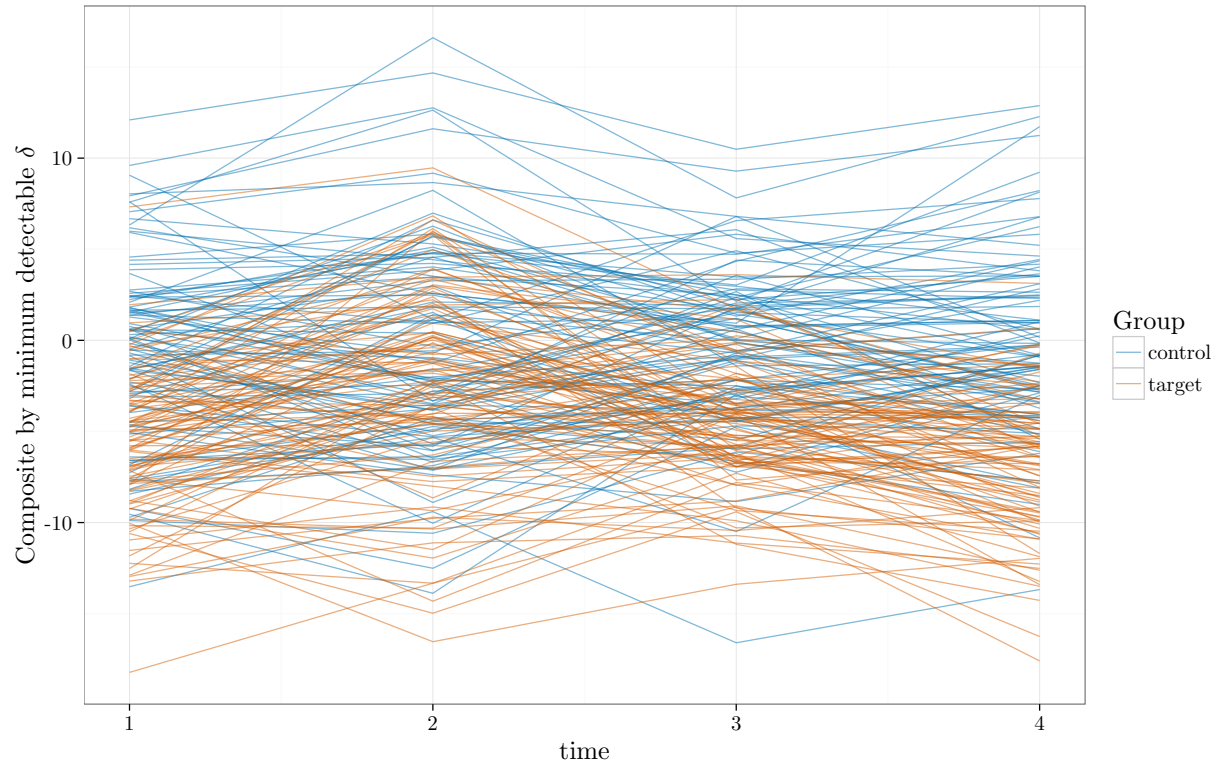

```
fit.min.delta <- gls(Y.min.delta ~ Time*Group, data = dd,
  correlation = corCompSymm(form = ~ time | id),
  weights = varIdent(form = ~ 1 | time)
)
```

```
summary(fit.min.delta)
```

Generalized least squares fit by REML

Model: Y.min.delta ~ Time \* Group

Data: dd

AIC BIC logLik

4267 4328 -2120

Correlation Structure: Compound symmetry

Formula: ~time | id

Parameter estimate(s):

Rho

0.667

Variance function:

Structure: Different standard deviations per stratum

Formula: ~1 | time

Parameter estimates:

|  | 1     | 2     | 3     | 4     |
|--|-------|-------|-------|-------|
|  | 1.000 | 1.284 | 0.871 | 0.988 |

Coefficients:

|                   | Value | Std.Error | t-value | p-value |
|-------------------|-------|-----------|---------|---------|
| (Intercept)       | -0.50 | 0.442     | -1.12   | 0.2610  |
| Time2             | 0.05  | 0.427     | 0.12    | 0.9009  |
| Time3             | 0.26  | 0.341     | 0.78    | 0.4377  |
| Time4             | 0.43  | 0.358     | 1.20    | 0.2324  |
| Grouptarget       | -5.12 | 0.625     | -8.20   | 0.0000  |
| Time2:Grouptarget | 3.14  | 0.604     | 5.20    | 0.0000  |
| Time3:Grouptarget | 0.65  | 0.482     | 1.35    | 0.1788  |
| Time4:Grouptarget | -1.62 | 0.506     | -3.20   | 0.0014  |

Correlation:

|                   | (Intr) | Time2  | Time3  | Time4  | Grptrg | Tm2:Gr | Tm3:Gr |
|-------------------|--------|--------|--------|--------|--------|--------|--------|
| Time2             | -0.148 |        |        |        |        |        |        |
| Time3             | -0.542 | 0.413  |        |        |        |        |        |
| Time4             | -0.420 | 0.421  | 0.533  |        |        |        |        |
| Grouptarget       | -0.707 | 0.104  | 0.383  | 0.297  |        |        |        |
| Time2:Grouptarget | 0.104  | -0.707 | -0.292 | -0.298 | -0.148 |        |        |
| Time3:Grouptarget | 0.383  | -0.292 | -0.707 | -0.377 | -0.542 | 0.413  |        |
| Time4:Grouptarget | 0.297  | -0.298 | -0.377 | -0.707 | -0.420 | 0.421  | 0.533  |

Standardized residuals:

|  | Min     | Q1      | Med    | Q3     | Max    |
|--|---------|---------|--------|--------|--------|
|  | -4.2520 | -0.6174 | 0.0169 | 0.6440 | 3.0062 |

Residual standard error: 4.42

Degrees of freedom: 800 total; 792 residual

```
contrast(fit.min.delta,  
  list(Time=levels(dd$Time)[4], Group = levels(dd$Group)[2]),  
  list(Time=levels(dd$Time)[4], Group = levels(dd$Group)[1])  
)
```

gls model parameter contrast

| Contrast | S.E.  | Lower | Upper | t     | df    | Pr(> t ) |   |
|----------|-------|-------|-------|-------|-------|----------|---|
|          | -6.74 | 0.617 | -7.95 | -5.53 | -10.9 | 792      | 0 |

## Appendix B. Optimized composite via logistic regression of group status

### Appendix B.1. Derive the component change scores

```
id group Z1.time Z2.time Z3.time Z4.time
1 1 0 0.135 0.616 -0.2625 -0.9623
2 2 0 -0.175 0.611 0.1136 -0.6167
3 3 0 0.437 0.292 0.0983 -0.0734
4 4 0 0.298 0.270 -0.0532 -1.5165
5 5 0 0.133 0.361 0.4870 -0.7063
6 6 0 0.362 0.199 0.5981 0.1439
```

### Appendix B.2. Fit logistic regression model

```
Call:
glm(formula = group ~ Z1.time + Z2.time + Z3.time + Z4.time,
     family = binomial, data = slopes)

Deviance Residuals:
    Min       1Q   Median       3Q      Max
-1.808  -1.088  -0.113    1.108    1.953

Coefficients:
            Estimate Std. Error z value Pr(>|z|)
(Intercept) -0.123640  0.153037  -0.81  0.41914
Z1.time     -0.633629  0.500755  -1.27  0.20575
Z2.time     -1.292543  0.370830  -3.49  0.00049 ***
Z3.time     -0.752636  0.339590  -2.22  0.02667 *
Z4.time     -0.000453  0.283759   0.00  0.99873
---
Signif. codes:  0 '***' 0.001 '**' 0.01 '*' 0.05 '.' 0.1 ' ' 1

(Dispersion parameter for binomial family taken to be 1)

    Null deviance: 277.26  on 199  degrees of freedom
Residual deviance: 255.17  on 195  degrees of freedom
AIC: 265.2

Number of Fisher Scoring iterations: 4
```

### Appendix B.3. Apply logistic regression weights

```
dd$Y.logistic <- apply(dd[, paste0('Z', 1:4)], 1,
  FUN = weighted.mean, w = weight_fit$coef[-1], na.rm = TRUE)*4
ggplot(dd, aes(x = time, y = Y.logistic, color = Group, group=id)) +
  geom_line(alpha=0.5) +
  ylab('Composite by logistic regression')
```

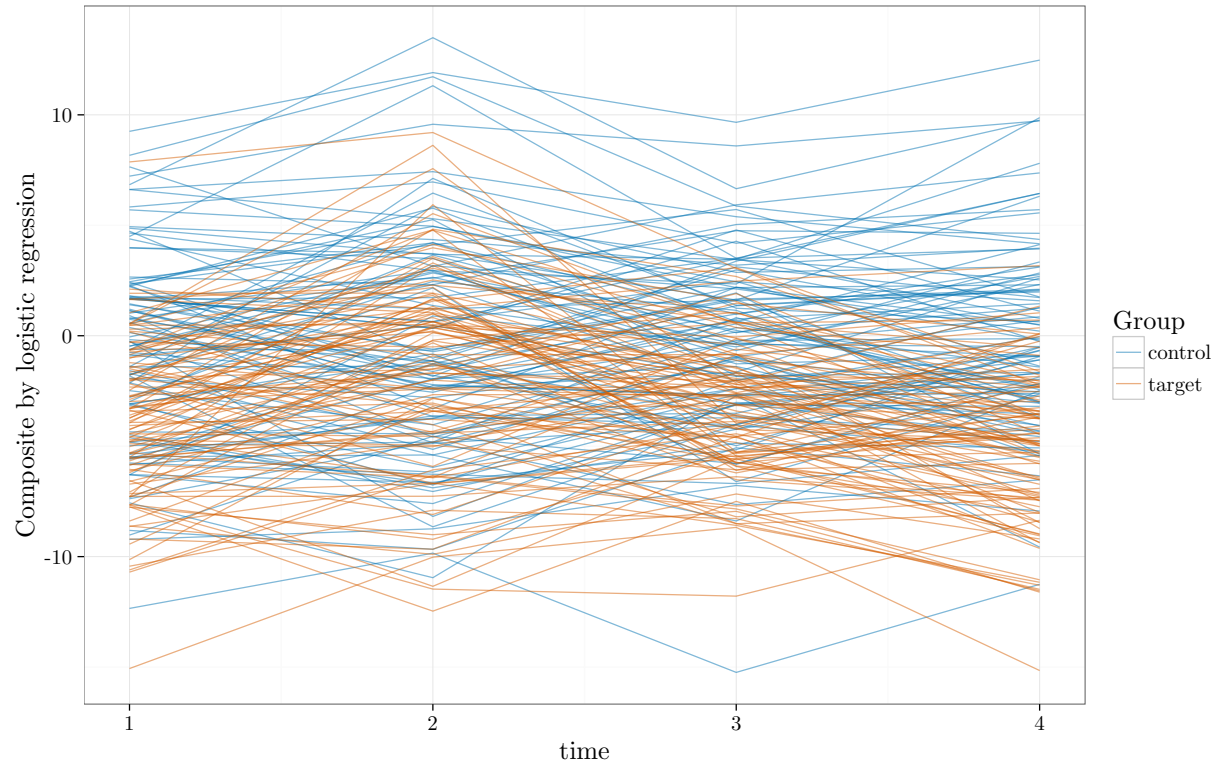



```

fit.logistic <- gls(Y.logistic ~ Time*Group, data = dd,
  correlation = corCompSymm(form = ~ time | id),
  weights = varIdent(form = ~ 1 | time)
)
summary(fit.logistic)

Generalized least squares fit by REML
Model: Y.logistic ~ Time * Group
Data: dd
AIC BIC logLik
4024 4084 -1999

Correlation Structure: Compound symmetry
Formula: ~time | id
Parameter estimate(s):
Rho
0.693
Variance function:
Structure: Different standard deviations per stratum
Formula: ~1 | time
Parameter estimates:
  1    2    3    4
1.000 1.231 0.895 0.973

Coefficients:
                Value Std.Error t-value p-value
(Intercept)    -0.49   0.392   -1.26  0.2076
Time2           0.08   0.353    0.23  0.8156
Time3           0.22   0.293    0.75  0.4521
Time4           0.48   0.303    1.58  0.1152
Grouptarget    -3.37   0.555   -6.07  0.0000
Time2:Grouptarget 2.25   0.499    4.51  0.0000
Time3:Grouptarget 0.32   0.415    0.77  0.4407
Time4:Grouptarget -1.67   0.429   -3.89  0.0001

Correlation:
                (Intr) Time2  Time3  Time4  Grptrg Tm2:Gr Tm3:Gr
Time2           -0.163
Time3           -0.507  0.431
Time4           -0.420  0.435  0.533
Grouptarget     -0.707  0.115  0.359  0.297
Time2:Grouptarget 0.115 -0.707 -0.305 -0.308 -0.163
Time3:Grouptarget 0.359 -0.305 -0.707 -0.377 -0.507  0.431
Time4:Grouptarget 0.297 -0.308 -0.377 -0.707 -0.420  0.435  0.533

Standardized residuals:
      Min      Q1      Med      Q3      Max
-4.26438 -0.67296  0.00579  0.66871  3.27230

Residual standard error: 3.92
Degrees of freedom: 800 total; 792 residual

```

```
contrast(fit.logistic,  
  list(Time=levels(dd$Time)[4], Group = levels(dd$Group)[2]),  
  list(Time=levels(dd$Time)[4], Group = levels(dd$Group)[1])  
)
```

gls model parameter contrast

| Contrast | S.E.  | Lower | Upper | t     | df    | Pr(> t ) |   |
|----------|-------|-------|-------|-------|-------|----------|---|
|          | -5.04 | 0.54  | -6.1  | -3.98 | -9.33 | 792      | 0 |

## Appendix C. Distribution of component $Z$ scores across studies

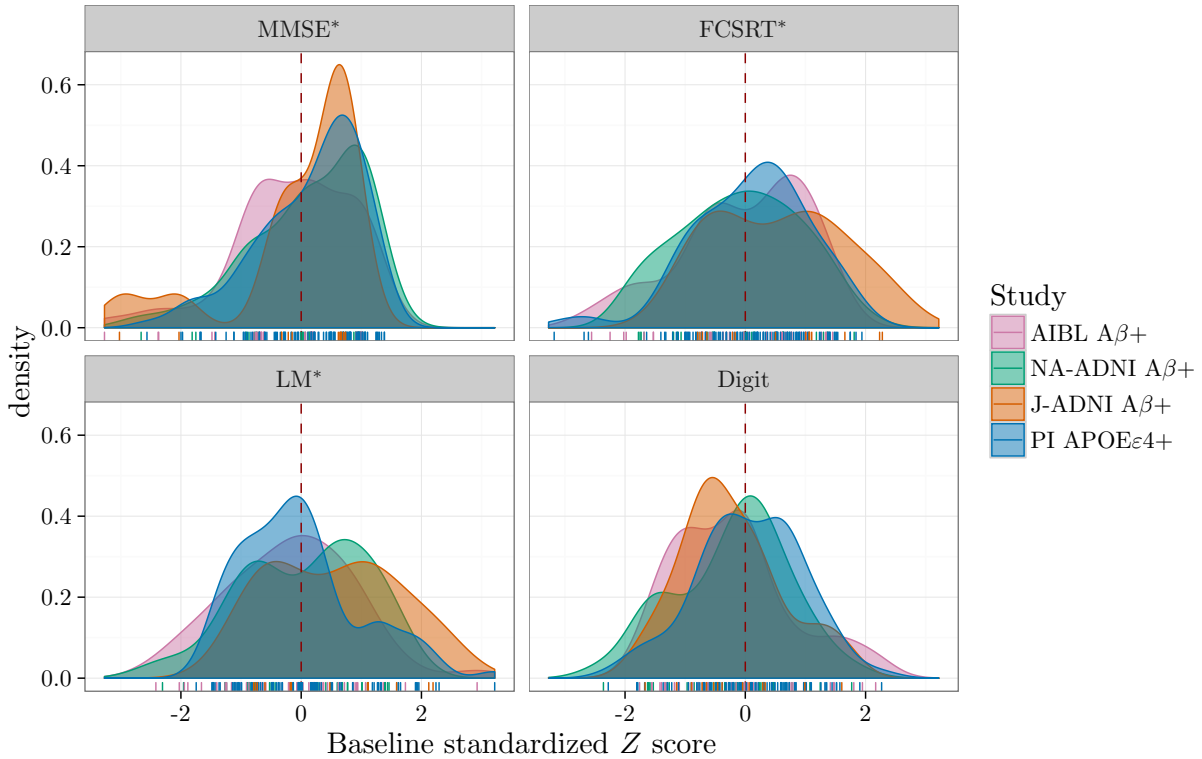

Figure C.1: Density estimates show the distribution of each component score at baseline, mean centered and standardized relative to the each sample's component standard deviation. For each study, we restricted the sample to the at risk A $\beta$ + population (or APOE $\epsilon$ 4+ for PI study).

AIBL = Australian Imaging, Biomarkers and Lifestyle; ADNI = Alzheimer's Disease Neuroimaging Initiative; NA-ADNI = North American ADNI; J-ADNI = Japan-ADNI; PI = Alzheimer's Disease Cooperative Study Prevention Instrument; CDR-G = Clinical Dementia Rating Global; MMSE = Mini-Mental State Exam; FCSRT = Free and Cued Selective Reminding Test; LM = Logical Memory; Digit = Digit Symbol Substitution.

\* See Table 1 for actual tests used in each study.

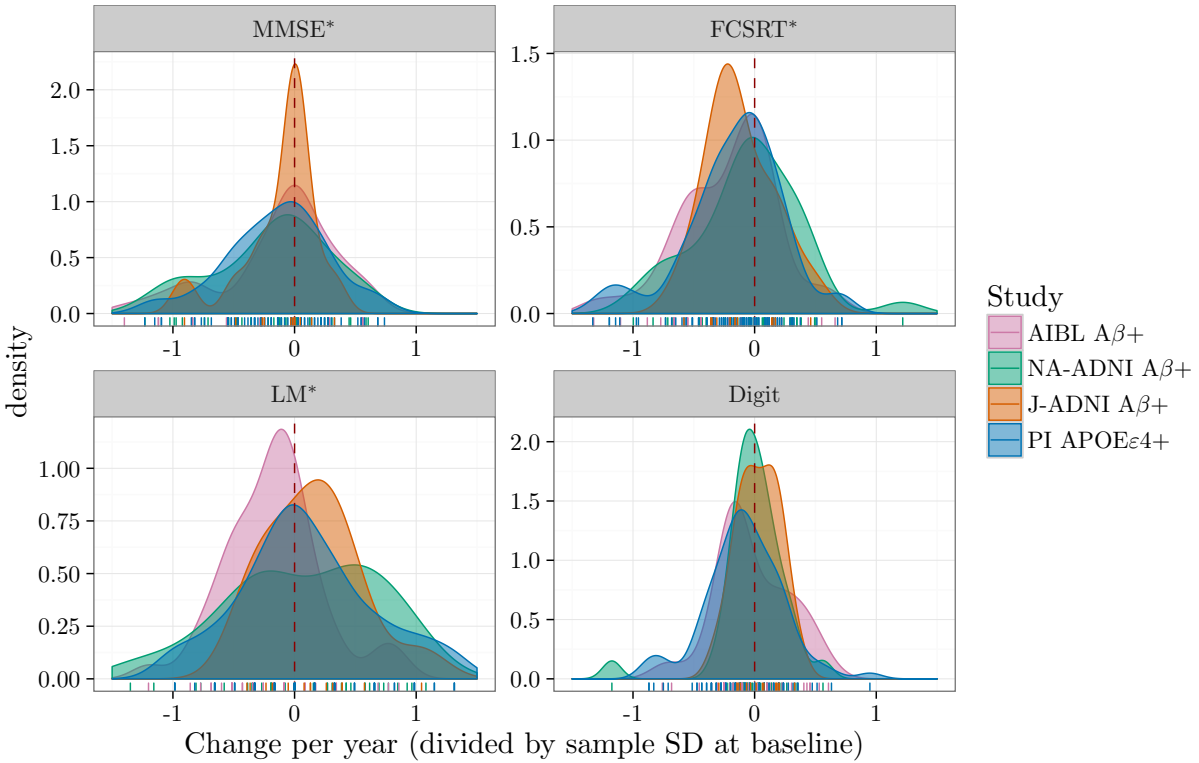

Figure C.2: Density estimates show the distribution of each component change per year standardized relative to the each sample's baseline standard deviation. Change scores are the slope parameters from ordinary least squares linear regression models fit separately for each subject. For each study, we restricted the sample to the at risk  $A\beta+$  population (or  $APOE\epsilon4+$  for PI study). AIBL = Australian Imaging, Biomarkers and Lifestyle; ADNI = Alzheimer's Disease Neuroimaging Initiative; NA-ADNI = North American ADNI; J-ADNI = Japan-ADNI; PI = Alzheimer's Disease Cooperative Study Prevention Instrument; CDR-G = Clinical Dementia Rating Global; MMSE = Mini-Mental State Exam; FCSRT = Free and Cued Selective Reminding Test; LM = Logical Memory; Digit = Digit Symbol Substitution.

\* See Table 1 for actual tests used in each study.
